# Supplementary material
Source: publisher site journal article supplement (https://www.dovepress.com/article/250918)
Supplement: Supplementary file 1 [file get_supplementary_file.php]

Manuscript title: A systematic review of instruments for the assessment of insomnia and sleep hygiene practices among adults

**SUPPLEMENTARY MATERIAL**

Complete database searches:

1. PubMed (1966-April 2018)

| Date | Combination of terms used                                                                               | Results | Limitations                                                                                           | Results after limitation |
|------|---------------------------------------------------------------------------------------------------------|---------|-------------------------------------------------------------------------------------------------------|--------------------------|
| 28/3 | (sleep disorders AND insomnia*) AND (Instrument OR questionnaire OR measure OR scale)                   | 3786    | Observational studies,<br>validation studies<br>human studies<br>English<br>Arabic<br>Adults (19-65+) | 99                       |
| 28/3 | <i>(Insomnia OR sleep deprivation) AND (Instrument OR subjective measure OR questionnaire)</i>          | 6387    | Validation studies<br>Observational studies<br>Human<br>English<br>Arabic<br>Adults (19-65+)          | 148                      |
| 7/4  | (sleep quality OR dyssomnias OR daytime sleepiness) AND (instrument OR questionnaire OR scale)          | 23529   | Validation studies<br>Human<br>English<br>Arabic<br>Adults (19-65+)                                   | 394                      |
| 7/4  | <i>(Sleep hygiene OR sleep habits OR sleep practices) AND (Instrument OR questionnaire OR measure*)</i> | 3258    | Validation studies<br>Observational studies<br>Human<br>English<br>Arabic<br>Adults (19-65+)          | 40                       |
| 28/3 | (("sleep arousal disorders" OR "sleep disturbance") AND insomnia* OR sleepiness)                        | 15989   | Validation studies<br>Human<br>English                                                                | 135                      |

|                                  |                                                                                                                                                                                                                                                                                                                     |      |                                                                                              |     |
|----------------------------------|---------------------------------------------------------------------------------------------------------------------------------------------------------------------------------------------------------------------------------------------------------------------------------------------------------------------|------|----------------------------------------------------------------------------------------------|-----|
|                                  | AND (Instrument OR questionnaire OR scale OR measure)                                                                                                                                                                                                                                                               |      | Arabic<br>Adults (19-65+)                                                                    |     |
| 7/4                              | ("sleep efficiency" OR "sleep dissatisfaction") AND (Instrument OR questionnaire OR scale OR measure)                                                                                                                                                                                                               | 1480 | Validation studies<br>Observational studies<br>Human<br>English<br>Arabic<br>Adults (19-65+) | 41  |
| 7/4                              | ("sleep disorders" OR "sleep quality" OR "sleep deprivation" OR "sleepiness" OR "insomnia" OR "sleep dysfunction" OR "dyssomnias" OR "sleep arousal disorders") AND (instrument OR tool OR scale OR questionnaire OR survey OR "patient-reported outcomes") AND ("validation studies" OR "psychometric properties") | 451  | No study limits<br><br>Human<br>English<br>Arabic<br>Adults (19-65+)                         | 320 |
| Total number of articles = 1,197 |                                                                                                                                                                                                                                                                                                                     |      |                                                                                              |     |

2. Embase (1980-April 2018)

| Date | Combination of terms used                                                                                                                                                                                                                                                                                                               | Results | Limitations                                                                                                                                                                                                                                                                                                                                       | Results after limitation |
|------|-----------------------------------------------------------------------------------------------------------------------------------------------------------------------------------------------------------------------------------------------------------------------------------------------------------------------------------------|---------|---------------------------------------------------------------------------------------------------------------------------------------------------------------------------------------------------------------------------------------------------------------------------------------------------------------------------------------------------|--------------------------|
| 26/3 | ('sleep arousal disorder'/exp OR 'sleep arousal disorder' OR 'insomnia'/exp OR 'insomnia' OR 'sleep quality'/exp OR 'sleep quality' OR 'daytime somnolence'/exp OR 'daytime somnolence')<br>AND<br>('questionnaire'/exp OR 'questionnaire' OR 'scale'/exp OR scale OR measure)<br>AND<br>('validation study'/exp OR 'validation study') | 204     | Diseases:<br>Insomnia, daytime somnolence and sleep disorders<br>Somnolence<br><br>-Human<br>-questionnaire<br>Validation studies<br>Observational studies<br><br>-cross sectional<br>-Validation process<br>-<br>Age (young adults to very elderly)<br><br>Publication type:<br>Articles<br>Conference abstracts<br>Conference papers<br>Reviews | 109                      |
| 27/3 | ('sleep hygiene'/exp OR 'sleep hygiene' OR 'sleep habit' OR 'sleep practices')<br>AND<br>(instrument OR 'questionnaire' OR scale OR measure)<br>AND<br>'validation'                                                                                                                                                                     | 26      | Diseases:<br>Insomnia, daytime somnolence and sleep disorders<br>Somnolence<br><br>-Human<br>-questionnaire<br>Validation studies<br><br>-Instrument validation<br><br>-Validation process                                                                                                                                                        | 7 (alert)                |

|      |                                                                                                                                                                                                                                                                              |                                                                                  |                                                                                                                                                                                                                                                                                                                                                                                                                                                           |                                    |
|------|------------------------------------------------------------------------------------------------------------------------------------------------------------------------------------------------------------------------------------------------------------------------------|----------------------------------------------------------------------------------|-----------------------------------------------------------------------------------------------------------------------------------------------------------------------------------------------------------------------------------------------------------------------------------------------------------------------------------------------------------------------------------------------------------------------------------------------------------|------------------------------------|
|      |                                                                                                                                                                                                                                                                              |                                                                                  | <p>-cross-sectional, retrospective studies</p> <p>Age (young adults to very elderly)</p> <p>Publication type:<br/>-Articles<br/><br/>-Conference abstracts</p>                                                                                                                                                                                                                                                                                            |                                    |
| 27/3 | <p>('sleep habit'/exp OR 'sleep habit' OR 'sleep hygiene'/exp OR 'sleep hygiene')</p> <p>AND</p> <p>('questionnaire'/exp OR 'questionnaire' OR 'survey'/exp OR 'survey')</p> <p>*The option (search as broadly as possible was selected from the Embase mapping options)</p> | <p>864</p> <p>(525 articles from Embase, 116 from Medline)</p> <p>223 (both)</p> | <p><i>Diseases:</i><br/>Insomnia, daytime somnolence and sleep disorders<br/>Somnolence</p> <p><i>Study type:</i><br/>-Human<br/>-questionnaire<br/>-longitudinal studies<br/>-structured questionnaires<br/>-cross-sectional,<br/>-Prospective studies</p> <p><i>Publication type:</i><br/>All (including conference abstracts, conference papers and review)</p> <p>(except letter and editorials)</p> <p><i>Age</i> (young adults to very elderly)</p> | <p>258</p> <p>(91 from Embase)</p> |
| 27/3 | <p>('insomnia'/syn OR 'sleep quality'/syn OR 'sleep disturbance'/syn)</p> <p>AND</p>                                                                                                                                                                                         | <p>980</p>                                                                       | <p><i>Diseases:</i><br/>Insomnia, daytime somnolence and sleep disorders<br/>Somnolence<br/>Drowsiness</p>                                                                                                                                                                                                                                                                                                                                                | <p>330 (Alert)</p>                 |

Manuscript title: A systematic review of instruments for the assessment of insomnia and sleep hygiene practices among adults

|                   |                                                |  |                                                                                                                                                                                                                                                                    |  |
|-------------------|------------------------------------------------|--|--------------------------------------------------------------------------------------------------------------------------------------------------------------------------------------------------------------------------------------------------------------------|--|
|                   | 'questionnaire'/syn<br>AND<br>'validation'/syn |  | <i>Study type:</i><br>-Human<br>-questionnaire<br>-validation studies<br>-validation process<br>- Instrument<br>validation<br>-cross-sectional,<br>-Prospective studies<br><br><i>Publication type:</i><br>Articles, conference<br>abstracts,<br>conference papers |  |
| EMBASE Total =706 |                                                |  |                                                                                                                                                                                                                                                                    |  |
